# Supplementary material
Source: PubMed Central journal article supplement (PMC4403152)
Supplement: pnas.201503863SI.pdf [file pnas.201503863SI.pdf]

# Supporting Information

Kim et al. 10.1073/pnas.1503863112

**If you were taking the picture and you took a few steps backward, what else do you think would come into your view?**

Well I think um there might be some picnic tables under some trees off to one  
EP SPA EP

side or the other, and probably a family with some children who have been  
SPA EP EP

utilizing the slide.  
TEA

**What else is in your imagination? What else would be in that scene if you had a wider view?**

There's probably some more play equipment over there like another swing,  
EP SPA EP

I think swings are the standard playground equipment and nowadays they make  
Irrelevant

swings with these seats curved where when I was growing up they were wooden.

**Can you think of any more you might see if you could see a larger scene here?**

Probably some more people picnicking in other areas.  
EP TEA

---

**If you were taking this picture and you took a few steps backwards, what else do you think would come into view?**

Probably a closed down bathroom on the right that they are working on. That's  
SD EP SPA TEA

why they have the porta potty.  
Irrelevant

**What else if you could see more of the background?**

Probably like a parking lot over on the left with some people getting out of and  
EP SPA EP TEA

some kids and stuff. Probably a water fountain over there to the left.  
EP EP SPA

**Using your imagination, can you tell me more?**

Probably some kids.  
R

**Any more?**

Maybe some construction going on on the other side of that fence.  
TEA SPA

That's about it.

**Fig. S1.** Sample content of the narratives provided by a control (*Top*) and a hippocampal patient (*Bottom*). The narratives shown here describe what might come into view beyond the scene in Fig. 4, *Left*. The narratives were segmented into details (underlined) and classified as belonging to one of four categories (labeled below each detail). Repeated or irrelevant details were discarded. EP, entities present; R, repeated detail; SD, sensory descriptions; SPA, spatial references; TEA, thoughts /emotions/ actions.

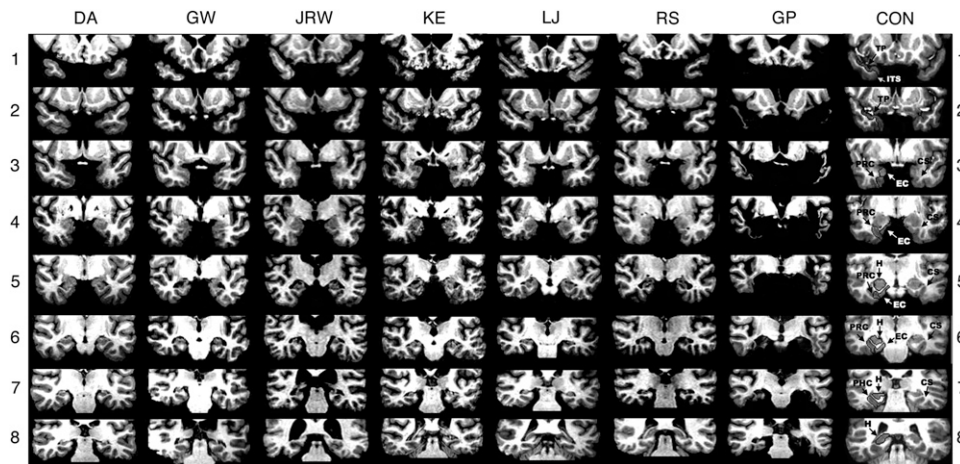

**Fig. S2.** Series of eight T1-weighted coronal images of six patients are illustrated with limited hippocampal lesions (DA, GW, JRW, KE, LJ, and RS), one patient with extensive medial temporal lobe damage (GP), and one control (CON). The sections proceed posteriorly in 7-mm intervals from the temporopolar (TP) cortex in the top section. The left side of the brain is on the right side of each image. As described by Insausti et al. (1), TP cortex extends medially from the inferotemporal sulcus (ITS) to the fundus of the TP sulcus. TP cortex extends rostrally from the tip of the temporal pole caudally to the limen insula (LI), which approximates the border between the TP cortex and perirhinal cortex (PRC). Caudal to TP cortex, the collateral sulcus (CS) is the most important structure for the identification of medial temporal lobe cortices. At its most rostral extent, the CS is surrounded entirely by PRC. Caudally, entorhinal cortex (EC) extends from the midpoint of the medial bank of the CS to the subiculum, whereas PRC extends laterally from the midpoint of the medial bank of the CS to the inferotemporal cortex. Two millimeters caudal to the disappearance of the gyrus intralimbicus of the hippocampus (H), the CS is surrounded by parahippocampal cortex (PHC). The caudal border of the posterior PHC is defined as lying 1.5 mm posterior to the crus of the fornix at the point where the fimbria turns upwards to continue as the posterior pillars of the fornix and posterior to the pulvinar nucleus of the thalamus (2). The top section (7) shows the TP cortex and the ITS in the control brain. None of the patients with limited hippocampal lesions have damage evident at this level. For GP, the TP cortex is missing. The ITS is visible bilaterally at this level for patients GW, JRW, KE, and RS. For LJ, only the right ITS is visible. For DA, the ITS is not visible on either side at this level. The second section (2) shows TP cortex and the ITS in the control brain. The ITS and TP cortex is evident in all patients with limited hippocampal lesions at this level. None of the patients with limited hippocampal lesions has damage evident at this level. For GP, note that the portion of the temporal lobe missing corresponds to TP cortex and involves the lateral temporal lobe to a minimal extent (~10%). The CS is visible, indicating the beginning of PRC, in patients KE and RS (right side only). The third section (3) shows the CS and surrounding PRC and EC in the control brain. None of the patients with limited hippocampal lesions have damage evident at this level with the exception of KE, who has damage in the basal ganglia secondary to toxic shock syndrome (and to a lesser extent in section 4). For patient DA, the CS is not evident at this level and PRC is evident bilaterally. For patients GW, KE, and LJ, the PRC is evident on the left side, bounded by the LI and CS. On the right side, both EC and PRC are evident. For patients JRW and RS, both EC and PRC are evident bilaterally. For GP, no CS or surrounding tissue is evident. The fourth section (4) shows the anterior hippocampus and the adjacent PRC and EC in the control brain. At this level, hippocampal damage is evident in patient DA. The hippocampus is not yet visible at this level in any of the other patients with limited hippocampal lesions. For DA, bilateral damage to the globus pallidus is evident at this level, presumably secondary to heroin overdose. No damage to the PRC or EC is evident for any of the patients at this level, except for GP, who has no medial temporal lobe tissue at this level. The fifth section (5) shows the hippocampus and the adjacent PRC and EC in the control brain. The CS and the surrounding PRC and EC appear normal in all patients at this level with the exception of GP, who has no medial temporal lobe tissue at this level. Damage is evident in the hippocampal region for all patients at this level. The surrounding PRC and EC appear normal in all patients except GP, who has little normal medial temporal lobe tissue in either hemisphere. Both the PRC and EC are visible in all hippocampal patients bilaterally, with the exception of JRW, for whom only PRC is visible on the left side, indicated by the disappearance of the gyrus intralimbicus between the fifth and sixth sections. The seventh section (7) shows the hippocampus and the CS, surrounded by PHC in the control brain. Damage to the hippocampus is evident in all patients at this level. In all patients with damage limited to the hippocampus, the PHC is evident, but in patient DA, the PRC is still visible on the right side. Patient GP has little normal medial temporal lobe tissue in either hemisphere. The eighth section (8) shows the hippocampus in the control brain. Bilateral hippocampal damage is evident in patients DA, GW, KE, and GP at this level. Patient LJ shows hippocampal damage only on the left side, and no damage is evident in patient RS. At this level, the hippocampus is no longer evident in patient JRW. PHC is no longer evident at this level in patients DA, JRW, KE, LJ, or RS and PHC appears normal in patient GW. Patient GP has some spared PHC on the right at this level. The warping artifact in the right lateral temporal lobe of GW on this section did not interfere with the assessment of his damage. Posterior to this level, GP exhibits hippocampal damage and damage to the PHC. No damage is evident posterior to this level for any of the other patients.

1. Insausti R, et al. (1998) MR volumetric analysis of the human entorhinal, perirhinal, and temporopolar cortices. *AJNR Am J Neuroradiol* 19(4):659-671.
2. Franko E, Insausti AM, Artacho-Perula E, Insausti R, Chavoix C (2014) Identification of the human medial temporal lobe regions on magnetic resonance images. *Hum Brain Mapp* 35(1): 248-256.
